# Supplementary material
Source: publisher figshare collection journal article supplement (https://acs.figshare.com/ndownloader/files/22151238)
Supplement: Supplementary file 1 [file 22151238]

# **A Series Three-Dimensional $\text{Ln}_4\text{Cr}_4$ ( $\text{Ln} = \text{Gd}, \text{Tb}, \text{Er}$ ) Heterometallic Cluster-Based Coordination Polymers Containing Interesting Nanotubes Exhibiting High Magnetic Entropy**

Yanzhao Yu<sup>[a]</sup>, Xingxiang Pan<sup>[a]</sup>, Chenhui Cui<sup>[a]</sup>, Ximing Luo<sup>[a]</sup>, Ningfang Li<sup>[a]</sup>,  
Hua Mei<sup>\*[a]</sup> and Yan Xu<sup>\*[a] [b]</sup>

<sup>[a]</sup>College of Chemical Engineering, State Key Laboratory of Materials-Oriented Chemical Engineering, Nanjing Tech University, Nanjing 210009, P. R. China

<sup>[b]</sup>Coordination Chemistry Institute, State Key Laboratory of Coordination Chemistry, Nanjing University, Nanjing 210093, P. R. China

## **Material and Methods**

All the raw chemicals and solvents were purchased from commercial sources and used without further purification. FT-IR spectra were recorded with Nicolet 470 FT-IR with KBr pellets in the 400 - 4000  $\text{cm}^{-1}$  region. Powder X-ray diffraction (PXRD) data was obtained from Bruker AXS X-ray diffractometer using Cu K $\alpha$  radiation ( $\lambda = 1.54056 \text{ nm}$ ) in the  $2\theta$  range of 5-50° with a step size of 0.02°. TG-DTA analyses were performed on a NETZSCH TG 209 F3 simultaneous thermal analyzer in flowing  $\text{N}_2$  with a heating rate of 10 °C/min. The direct current (dc) magnetic data were measured between 1.8 and 300 K under an applied field of 1000 Oe. The magnetization measurements were made in fields

of between 0 and 7 T at 1.8-10 K on MPMS-XL7 SQUID magnetometer. Solid-state luminescence properties were acquired by a F-4600 FL spectrophotometer.

### **Single Crystal X-ray Diffraction**

The crystal structure was defined by using the single-crystal X-ray diffraction. Diffraction data for compounds were collected on a Bruker SMART APEX II CCD area-detector diffractometer (Mo  $K\alpha$  radiation) at room temperature with  $\omega$ -scan technique. Empirical adsorption correction was utilized using SADABS program.<sup>1</sup> The structure was resolved by direct methods and refined by full-matrix least squares on  $F^2$  using SHELXTL-2018 software.<sup>2</sup> Non-hydrogen atoms were refined anisotropically. Compared with Ln atoms, H atoms of water are very light, and not located. All calculations were performed by using SHELXTL-2018.

## Synthetic Discussion

In this work, the nicotinic acid was chose as bridging ligand to construct three novel 3D coordination polymers (**1-Gd**, **2-Tb**, **3-Er**) with interesting and perfect 1D nanotubes. In order to obtain above compounds, we tried to change the reaction time, reaction temperature and pH value, and finally obtained the crystals by using the synthetic condition described.

During the synthetic process, we found that the formic acid and KBr is important for synthesizing crystals. Although the two raw materials didn't participate the construction of the structure for the three compounds, we can not get the crystals if these two raw materials were lacked. We speculate that these two raw materials act as structural inducer during the crystal structure construction process.<sup>3</sup>

Also, we try to change the lanthanide source to lanthanide chloride, lanthanide nitrate, lanthanide acetate and other lanthanides (Ho, Dy, Eu), unfortunately, no isomorphs or new compounds were gained. The above results indicate that it is advantageous to synthesize these Ln-TM compounds with 3D frameworks with lanthanide oxides as rare earth sources under low pH value.<sup>4</sup>

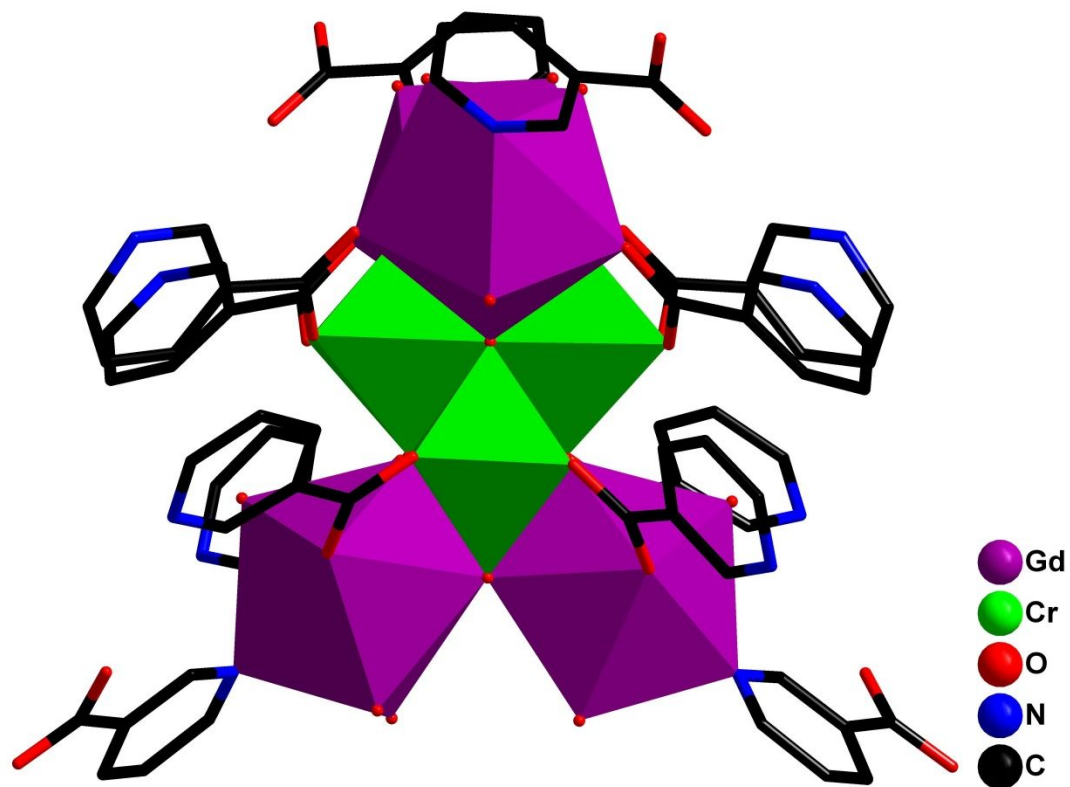

**Figure S1.** The polyhedron structure of the basic unit for **1-Gd**. Hydrogen atoms were omitted for clarity.

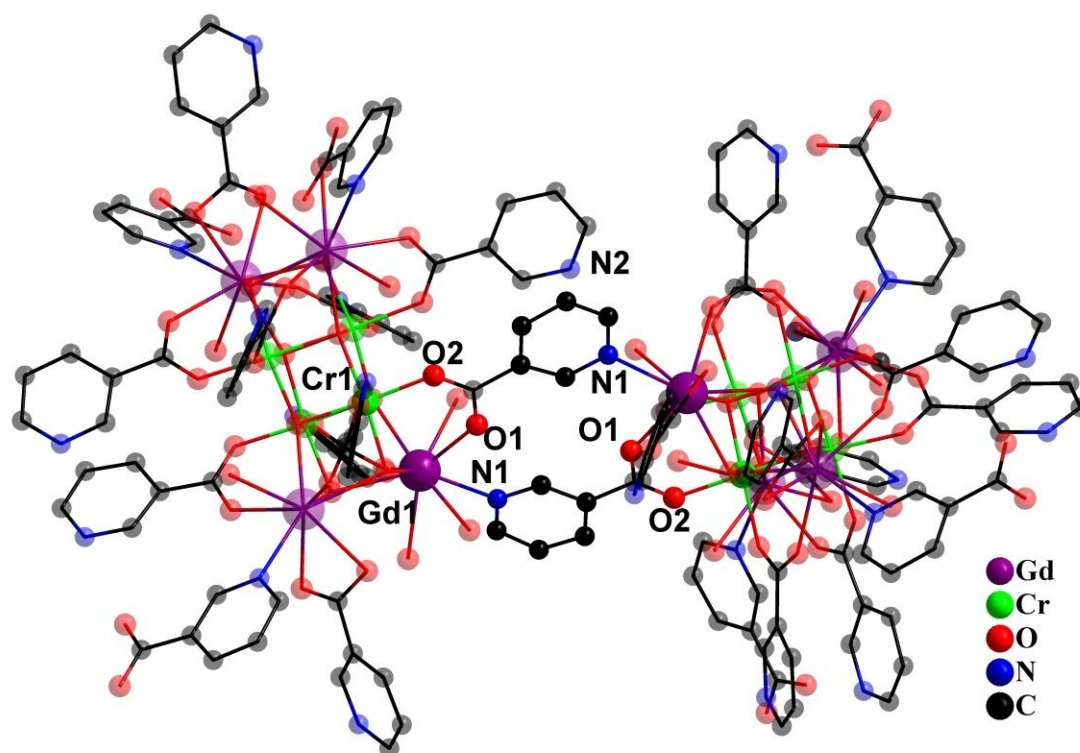

**Figure S2.** Connection mode of adjacent  $\text{Gd}_4\text{Cr}_4$  clusters in **1-Gd**. H atoms and lattice water molecules were omitted for clarity.

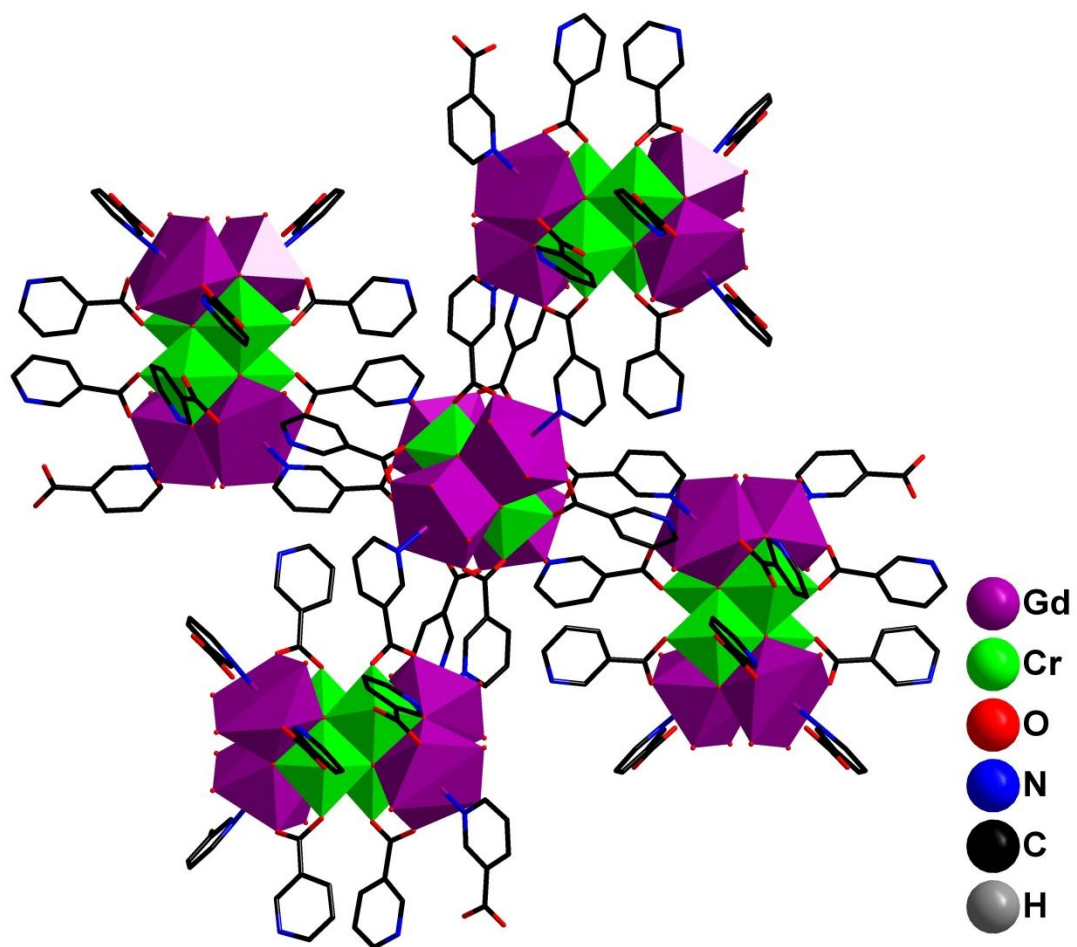

**Figure S3.** 4-connected mode of  $\text{Gd}_4\text{Cr}_4$  cluster in **1-Gd**. H atoms and lattice water molecules were omitted for clarity.

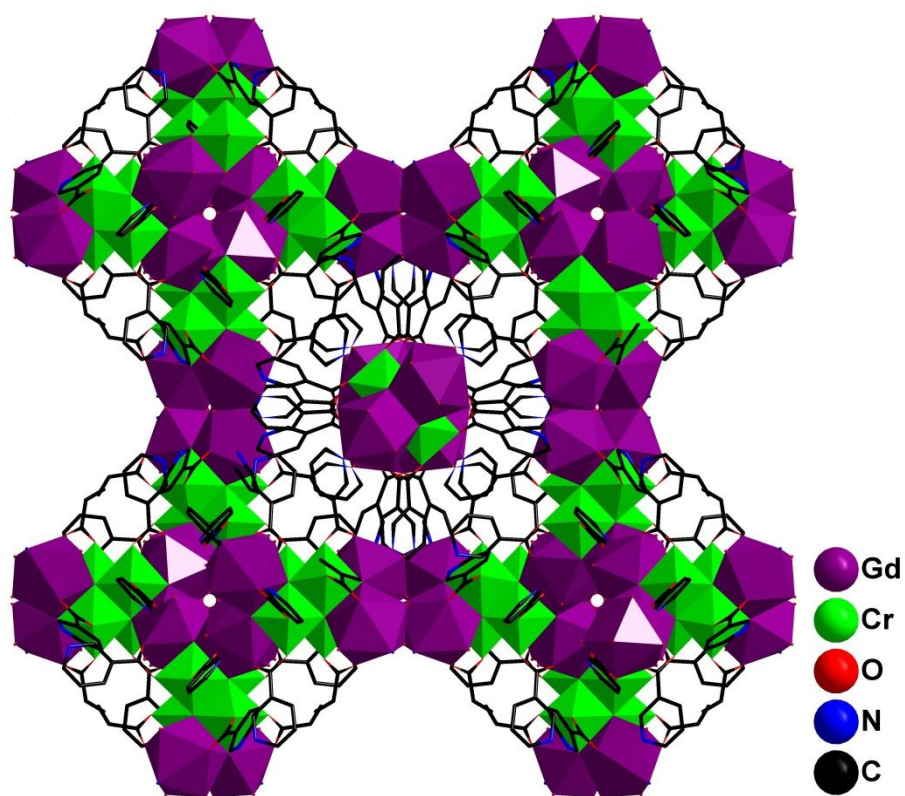

**Figure S4.** Stick and polyhedral representation of 3D structure of **1-Gd**.

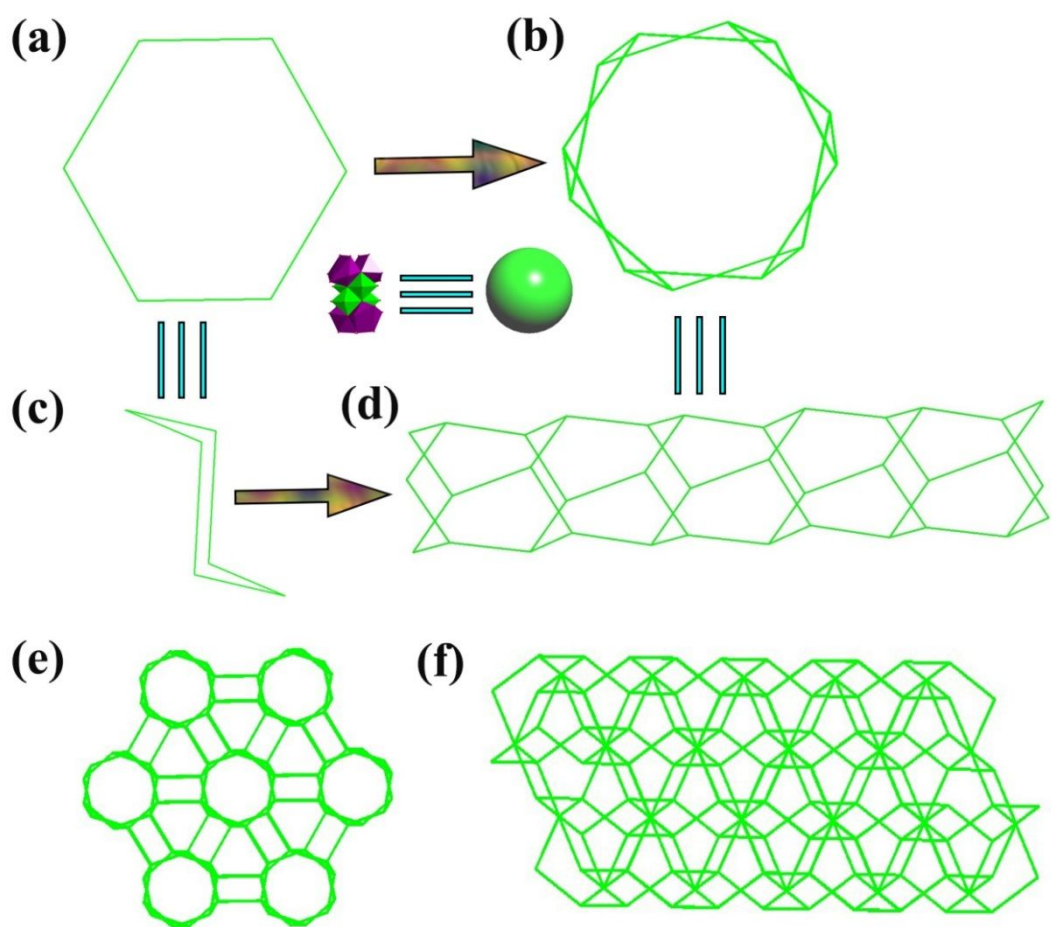

Figure S5. (a) The simplified hexatomic ring; (b) The aperture of 1D tube; (c) The Z-shaped hexatomic ring; (d) The topology network of 1D tube; (e) The topology network of honeycomb-shaped coordination polymer; (f) The topology network of the 3D 1-Gd.

## IR Spectra

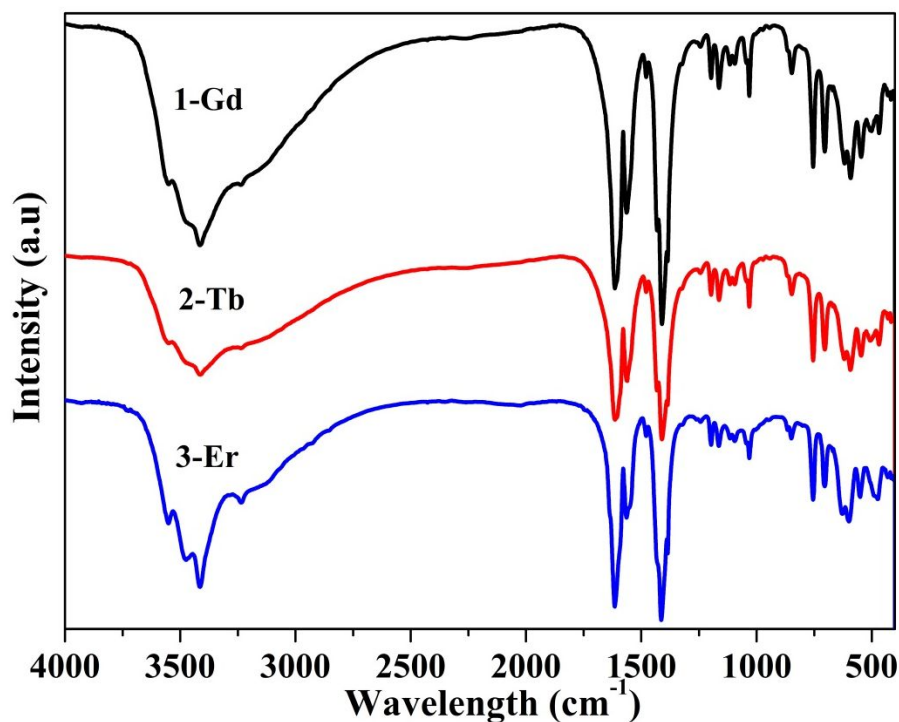

**Figure S6.** The IR spectrum of  $\text{Ln}_4\text{Cr}_4$ .

The IR spectra of three compounds are similar. As shown in Fig. S5, the broad bands appeared at  $3412\text{ cm}^{-1}$  were ascribed to the  $\nu(\text{-OH})$ . The vibration peaks at  $1608\text{ cm}^{-1}$  is characteristic peak of pyridine ring in the nicotinic acid ligand. The peak at  $1403\text{ cm}^{-1}$  is assigned to the  $\nu(\text{C=O})$ . The peaks located between  $752\text{--}583\text{ cm}^{-1}$  are correspond to  $\nu(\text{Gd-O})$  and  $\nu(\text{Cr-O})$ . The IR spectra implies that the nicotinic acid ligands exist in three compounds, which are well matched with the SCXRD analysis.

## Powder X-ray Diffraction (PXRD)

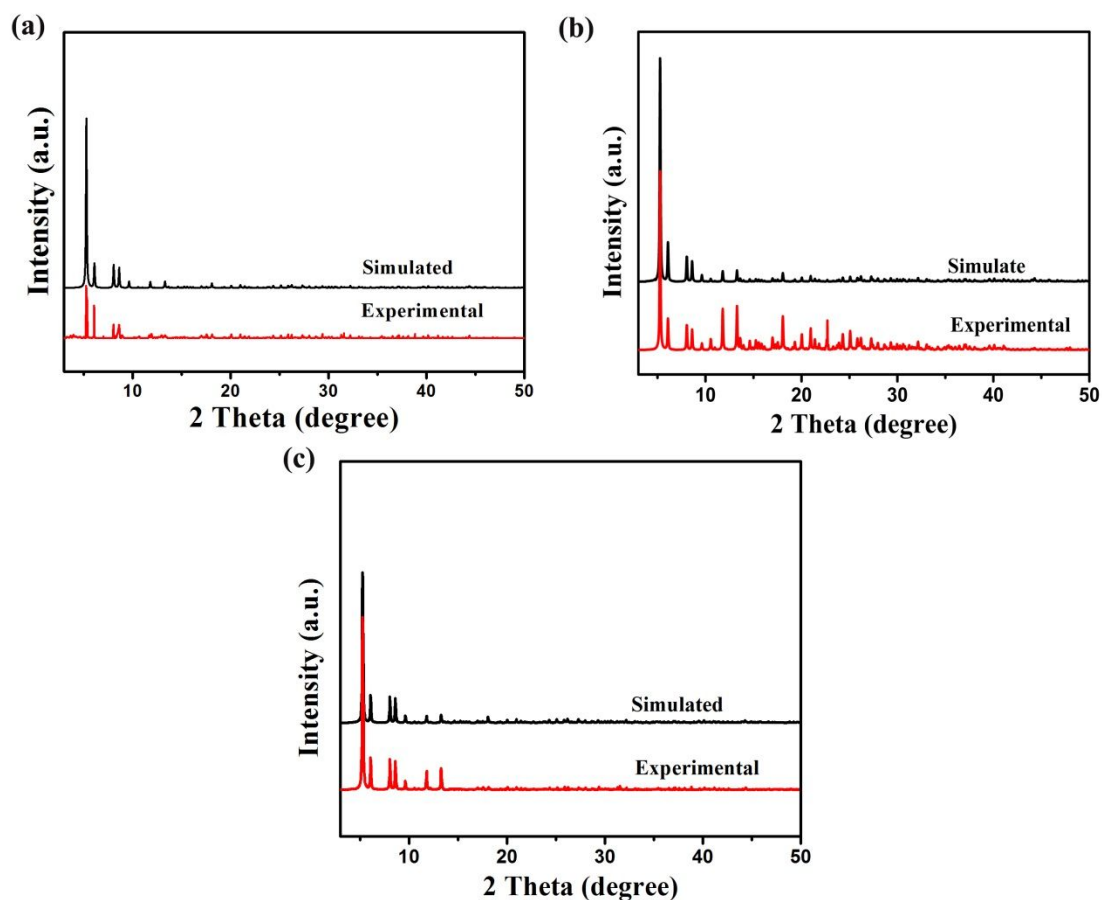

**Figure S7.** The PXRD spectrum of (a) **1-Gd**; (b) **2-Tb**; (c) **3-Er**.

The PXRD patterns of the three complexes are presented in Fig. S6. The position of main diffraction peaks in the experimental patterns match well with the simulated results from SCXRD, which can imply that the three compounds are pure phase. The difference in reflection intensities may be attributed to the different orientation of the powder samples.

## Thermal Gravimetric (TG) Analysis

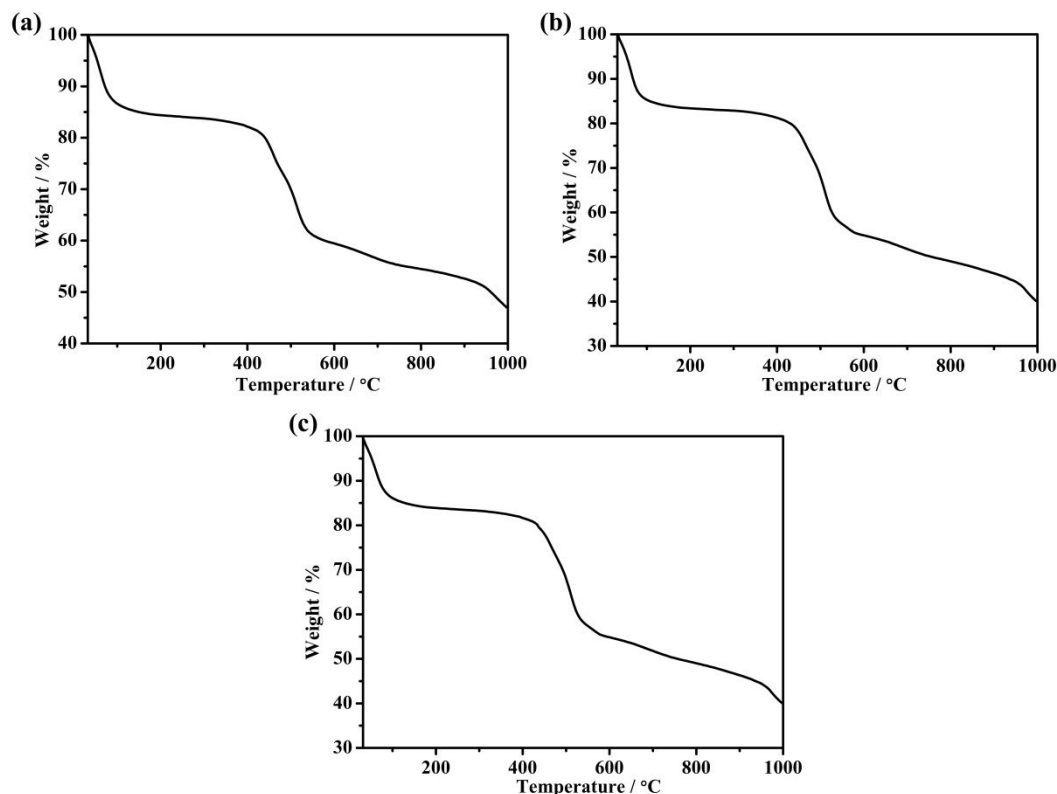

**Figure S8.** The TG curves for (a) **1-Gd**; (b) **2-Tb**; (c) **3-Er**.

TG analysis was employed to assess the thermal stability of **Ln<sub>4</sub>Cr<sub>4</sub>** from 32 to 1000 °C under N<sub>2</sub> atmosphere. As displayed in Fig. S7, the three compounds exist two similar continuous processes of weight loss. The weight loss of the first process between 32 to 403°C is 17.93, 18.83 and 18.94 %, respectively, (calc. 18.81, 17.73 and 19.50 %), attributing to the loss of lattice water molecules and 12 coordination water molecules in **Ln<sub>4</sub>Cr<sub>4</sub>**. The weight loss at 403–1000 °C for three compounds are assigned to the loss of nicotinic acid ligands and the collapse of the structure of **Ln<sub>4</sub>Cr<sub>4</sub>**. The results of TG analysis imply that the three compounds own high thermal stability.

**Table S1.** Comparison of  $-\Delta S_m^{\max}$  data of the Gd-compound.

| compounds                                                                                                                                                                                                                                                                                                                                                              | $-\Delta S_m$<br>(J K <sup>-1</sup> kg <sup>-1</sup> ) | $\Delta H$<br>(T) | $T$<br>(K) | Dimensionality | Ref.      |
|------------------------------------------------------------------------------------------------------------------------------------------------------------------------------------------------------------------------------------------------------------------------------------------------------------------------------------------------------------------------|--------------------------------------------------------|-------------------|------------|----------------|-----------|
| [Gd <sub>60</sub> (CO <sub>3</sub> ) <sub>8</sub> (CH <sub>3</sub> COO) <sub>12</sub> (μ <sub>2</sub> -OH) <sub>24</sub> (μ <sub>3</sub> -OH) <sub>96</sub> (H <sub>2</sub> O) <sub>56</sub> ](NO <sub>3</sub> ) <sub>15</sub> Br <sub>12</sub> (CH <sub>3</sub> C(OH) <sub>2</sub> -COO) <sub>5</sub> ·30CH <sub>3</sub> OH·20CH <sub>3</sub> C(OH) <sub>2</sub> COOH | 48.0                                                   | 7                 | 2.0        | 0D             | [5]       |
| [Co <sup>II</sup> <sub>9</sub> Gd <sup>III</sup> <sub>42</sub> (μ <sub>3</sub> -OH) <sub>68</sub> (CO <sub>3</sub> ) <sub>12</sub> (OAc-) <sub>30</sub> (H <sub>2</sub> O) <sub>70</sub> ](ClO <sub>4</sub> ) <sub>24</sub> ·80H <sub>2</sub> O                                                                                                                        | 41.3                                                   | 7                 | 2.0        | 0D             | [6]       |
| Ni <sup>II</sup> <sub>12</sub> Gd <sup>III</sup> <sub>36</sub> (OAc) <sub>18</sub> (μ <sub>3</sub> -OH) <sub>84</sub> (μ <sub>4</sub> -O) <sub>6</sub> -(H <sub>2</sub> O) <sub>54</sub> (NO <sub>3</sub> )Cl <sub>2</sub> [(NO <sub>3</sub> ) <sub>6</sub> Cl <sub>9</sub> ·30H <sub>2</sub> O                                                                        | 36.3                                                   | 7                 | 3.0        | 0D             | [7]       |
| [Ni <sup>II</sup> <sub>2</sub> Gd <sup>III</sup> <sub>2</sub> (C(CH <sub>3</sub> ) <sub>3</sub> CO) <sub>4</sub> (OAc) <sub>6</sub> (H <sub>2</sub> O)]·-2CH <sub>2</sub> Cl <sub>2</sub>                                                                                                                                                                              | 34.4                                                   | 7                 | 4.5        | 0D             | [8]       |
| [Co <sup>II</sup> <sub>6</sub> Gd <sup>III</sup> <sub>8</sub> (μ <sub>3</sub> -OH) <sub>8</sub> (O <sub>3</sub> P <sup>t</sup> Bu) <sub>6</sub> (C(CH <sub>3</sub> ) <sub>3</sub> -CHO) <sub>16</sub> -(H <sub>2</sub> O) <sub>2</sub> ]·2CH <sub>3</sub> CN                                                                                                           | 33.0                                                   | 14                | 4.0        | 0D             | [9]       |
| [Ni <sup>II</sup> <sub>10</sub> Gd <sup>III</sup> <sub>5</sub> (μ <sub>3</sub> -OH) <sub>10</sub> (μ <sub>5</sub> -NO <sub>3</sub> )(C <sub>6</sub> H <sub>5</sub> N-O <sub>2</sub> ) <sub>10</sub> (C <sub>6</sub> H <sub>4</sub> N <sub>3</sub> O) <sub>10</sub> ](NO <sub>3</sub> ) <sub>4</sub> ·12H <sub>2</sub> O·CH <sub>3</sub> OH                             | 27.5                                                   | 7                 | 4.0        | 0D             | [10]      |
| [Cr <sup>III</sup> <sub>4</sub> Gd <sup>III</sup> <sub>4</sub> (μ <sub>3</sub> -O) <sub>4</sub> (μ <sub>4</sub> -O) <sub>4</sub> (NA) <sub>8</sub> (H <sub>2</sub> O) <sub>12</sub> ·13H <sub>2</sub> O                                                                                                                                                                | 22.1                                                   | 7                 | 2.5        | 3D             | This work |
| [Co <sup>II</sup> <sub>3</sub> Co <sup>III</sup> <sub>2</sub> Gd <sub>3</sub> (C <sub>8</sub> H <sub>16</sub> NO <sub>2</sub> ) <sub>2</sub> (μ <sub>3</sub> -OH) <sub>5</sub> (C-(CH <sub>3</sub> ) <sub>3</sub> CO) <sub>12</sub> ]·2H <sub>2</sub> O                                                                                                                | 21.6                                                   | 7                 | 3.0        | 0D             | [11]      |
| [Cr <sup>III</sup> <sub>4</sub> Gd <sup>III</sup> <sub>4</sub> (C <sub>6</sub> H <sub>4</sub> NO <sub>2</sub> ) <sub>10</sub> (μ <sub>3</sub> -OH) <sub>4</sub> (μ <sub>4</sub> -O-) <sub>4</sub> (H <sub>2</sub> O) <sub>8</sub> ]·[C <sub>6</sub> H <sub>5</sub> NO <sub>2</sub> ] <sub>2</sub> ·8H <sub>2</sub> O                                                   | 18.1                                                   | 7                 | 3.0        | 0D             | [12]      |
| [Zn <sup>II</sup> <sub>8</sub> Gd <sup>III</sup> <sub>4</sub> (OH) <sub>8</sub> (C <sub>6</sub> H <sub>6</sub> NO) <sub>8</sub> (O <sub>2</sub> CCH-Me <sub>2</sub> ) <sub>8</sub> ](ClO <sub>4</sub> ) <sub>4</sub>                                                                                                                                                   | 18.0                                                   | 7                 | 2.0        | 0D             | [13]      |
| [Ni <sup>II</sup> <sub>3</sub> Gd <sup>III</sup> <sub>3</sub> (C <sub>6</sub> H <sub>6</sub> NO) <sub>4</sub> (OAc) <sub>5</sub> ]·H <sub>2</sub> O·CH <sub>2</sub> -Cl <sub>2</sub>                                                                                                                                                                                   | 17.4                                                   | 7                 | 4.5        | 0D             | [14]      |
| [Cu <sup>II</sup> <sub>5</sub> Gd <sup>III</sup> <sub>2</sub> (OAc) <sub>10</sub> (NO <sub>3</sub> ) <sub>4</sub> (C <sub>16</sub> H <sub>17</sub> O <sub>3</sub> ) <sub>2</sub> -(C <sub>16</sub> H <sub>18</sub> O <sub>3</sub> ) <sub>2</sub> ]·4Me <sub>2</sub> CO                                                                                                 | 15.7                                                   | 5                 | 2.0        | 0D             | [15]      |
| [Cu <sup>II</sup> <sub>12</sub> Gd <sup>III</sup> <sub>6</sub> (C <sub>12</sub> H <sub>10</sub> O <sub>3</sub> N <sub>2</sub> ) <sub>6</sub> (OH) <sub>12</sub> (NO <sub>3</sub> -) <sub>7</sub> (OAc) <sub>3</sub> (H <sub>2</sub> O) <sub>12</sub> ](OH) <sub>8</sub> ·19H <sub>2</sub> O·MeCN                                                                       | 14                                                     | 7                 | 4.5        | 0D             | [16]      |
| [Mn <sup>III</sup> <sub>6</sub> Gd <sup>III</sup> <sub>2</sub> (μ <sub>3</sub> -OH) <sub>4</sub> (μ <sub>4</sub> -O)(OAc) <sub>4</sub> -(H <sub>2</sub> O) <sub>2</sub> (C <sub>16</sub> H <sub>14</sub> O <sub>3</sub> N) <sub>6</sub> ·NO <sub>3</sub> ·OH                                                                                                           | 10.3                                                   | 7                 | 6          | 0D             | [17]      |

OAc = acetate. NA = nicotinic acid. MeCN=acetonitrile. Me=-CH<sub>3</sub>. P<sup>t</sup>Bu=tert-butylphosphonic acid(H<sub>2</sub>O<sub>3</sub>P<sup>t</sup>Bu)

## Reference

- [1] G. M. Sheldrick, *SADABS, Program for Bruker Area Detector Absorption Correction*, University of Göttingen, Göttingen, Germany, **1997**.
- [2] G. M. Sheldrick, *SHELXTL* Bruker Analytical X-Ray Instruments Inc., Madison, WI, **2018**.
- [3] L. Chen, L. Huang, C. L. Wang, J. Fu, D. Zhang, D. R. Zhu, Y. Xu, *J. Coord. Chem.* **2012**, 65, 958-968.
- [4] Y. Q. Sun, J. Zhang, Y. M. Chen, G. Y. Yang, *Angew. Chem. Int. Ed.* **2005**, 36, 5964-5967.
- [5] X. M. Luo, Z. B. Hu, Q. F. Lin, W. W. Cheng, J. P. Cao, C. H. Cui, H. Mei, Y. Song, Y. Xu. *J. Am. Chem. Soc.* **2018**, 140, 11219–11222.
- [6] J. B. Peng, Q. C. Zhang, X. J. Kong, Y. Z. Zheng, Y. P. Ren, L. S. Long, R. B. Huang, L. S. Zheng, Z. Zheng, *J. Am. Chem. Soc.* **2012**, 134, 3314–3317.
- [7] J. B. Peng, Q. C. Zhang, X. J. Kong, Y. P. Ren, L. S. Long, R. B. Huang, L. S. Zheng, Z. Zheng, *Angew. Chem. Int. Ed.* **2011**, 50, 10649–10652.
- [8] P. Wang, S. Shannigrahi, L. Yakovlev Nikolai, T. S. A. Hor, *Chem. Asian J.* **2013**, 8, 2943–2946.
- [9] Y. Z. Zheng, M. Evangelisti, F. Tuna, R.E.P. Winpenny, *J. Am. Chem. Soc.* **2012**, 134, 1057–1065.

- [10] G. J. Zhou, W. P. Chen, Y. Yu, L. Qin, T. Han, Y. Z. Zheng, *Inorg. Chem.* **2017**, 56, 12821–12829.
- [11] J. A. Sheikh, S. Goswami, S. Konar, *Dalton Trans.* **2014**, 43, 14577–14585.
- [12] C. H. Cui, J. P. Cao, X. M. Luo, Q. F. Lin, Y. Xu, *Chem. Eur. J.* **2018**, 24, 15295–15302.
- [13] N. Hooper Thomas, J. Schnack, S. Piligkos, M. Evangelisti, K. Brechin Euan, *Angew. Chem. Int. Ed.* **2012**, 51, 4633–4636.
- [14] P. Wang, S. Shannigrahi, N. L. Yakovlev, T. S. A. Hor, *Dalton Trans.* **2014**, 43, 182–187.
- [15] D. Dermitzaki, O. Bistola, M. Pissas, V. Psycharis, Y. Sanakis, C. P. Raptopoulou, *Polyhedron*. **2018**, 150, 47–53.
- [16] J. L. Liu, Y. C. Chen, Q. W. Li, S. Gomez-Coca, D. Aravena, E. Ruiz, W. Q. Lin, J. D. Leng, M. L. Tong, *Chem. Commun.* 2013, 49, 6549–6551.
- [17] P. Hu, X. N. Wang, C. G. Jiang, F. Yu, B. Li, G. L. Zhuang, T. Zhang, *Inorg. Chem.* **2018**, 57, 8639–8645.
